# Supplementary material for: Mice lacking NF-κB1 exhibit marked DNA damage responses and more severe gastric pathology in response to intraperitoneal tamoxifen administration
Source: PubMed Central journal article supplement (PMC5584614; doi:10.1038/cddis.2017.332), 2017-07-20

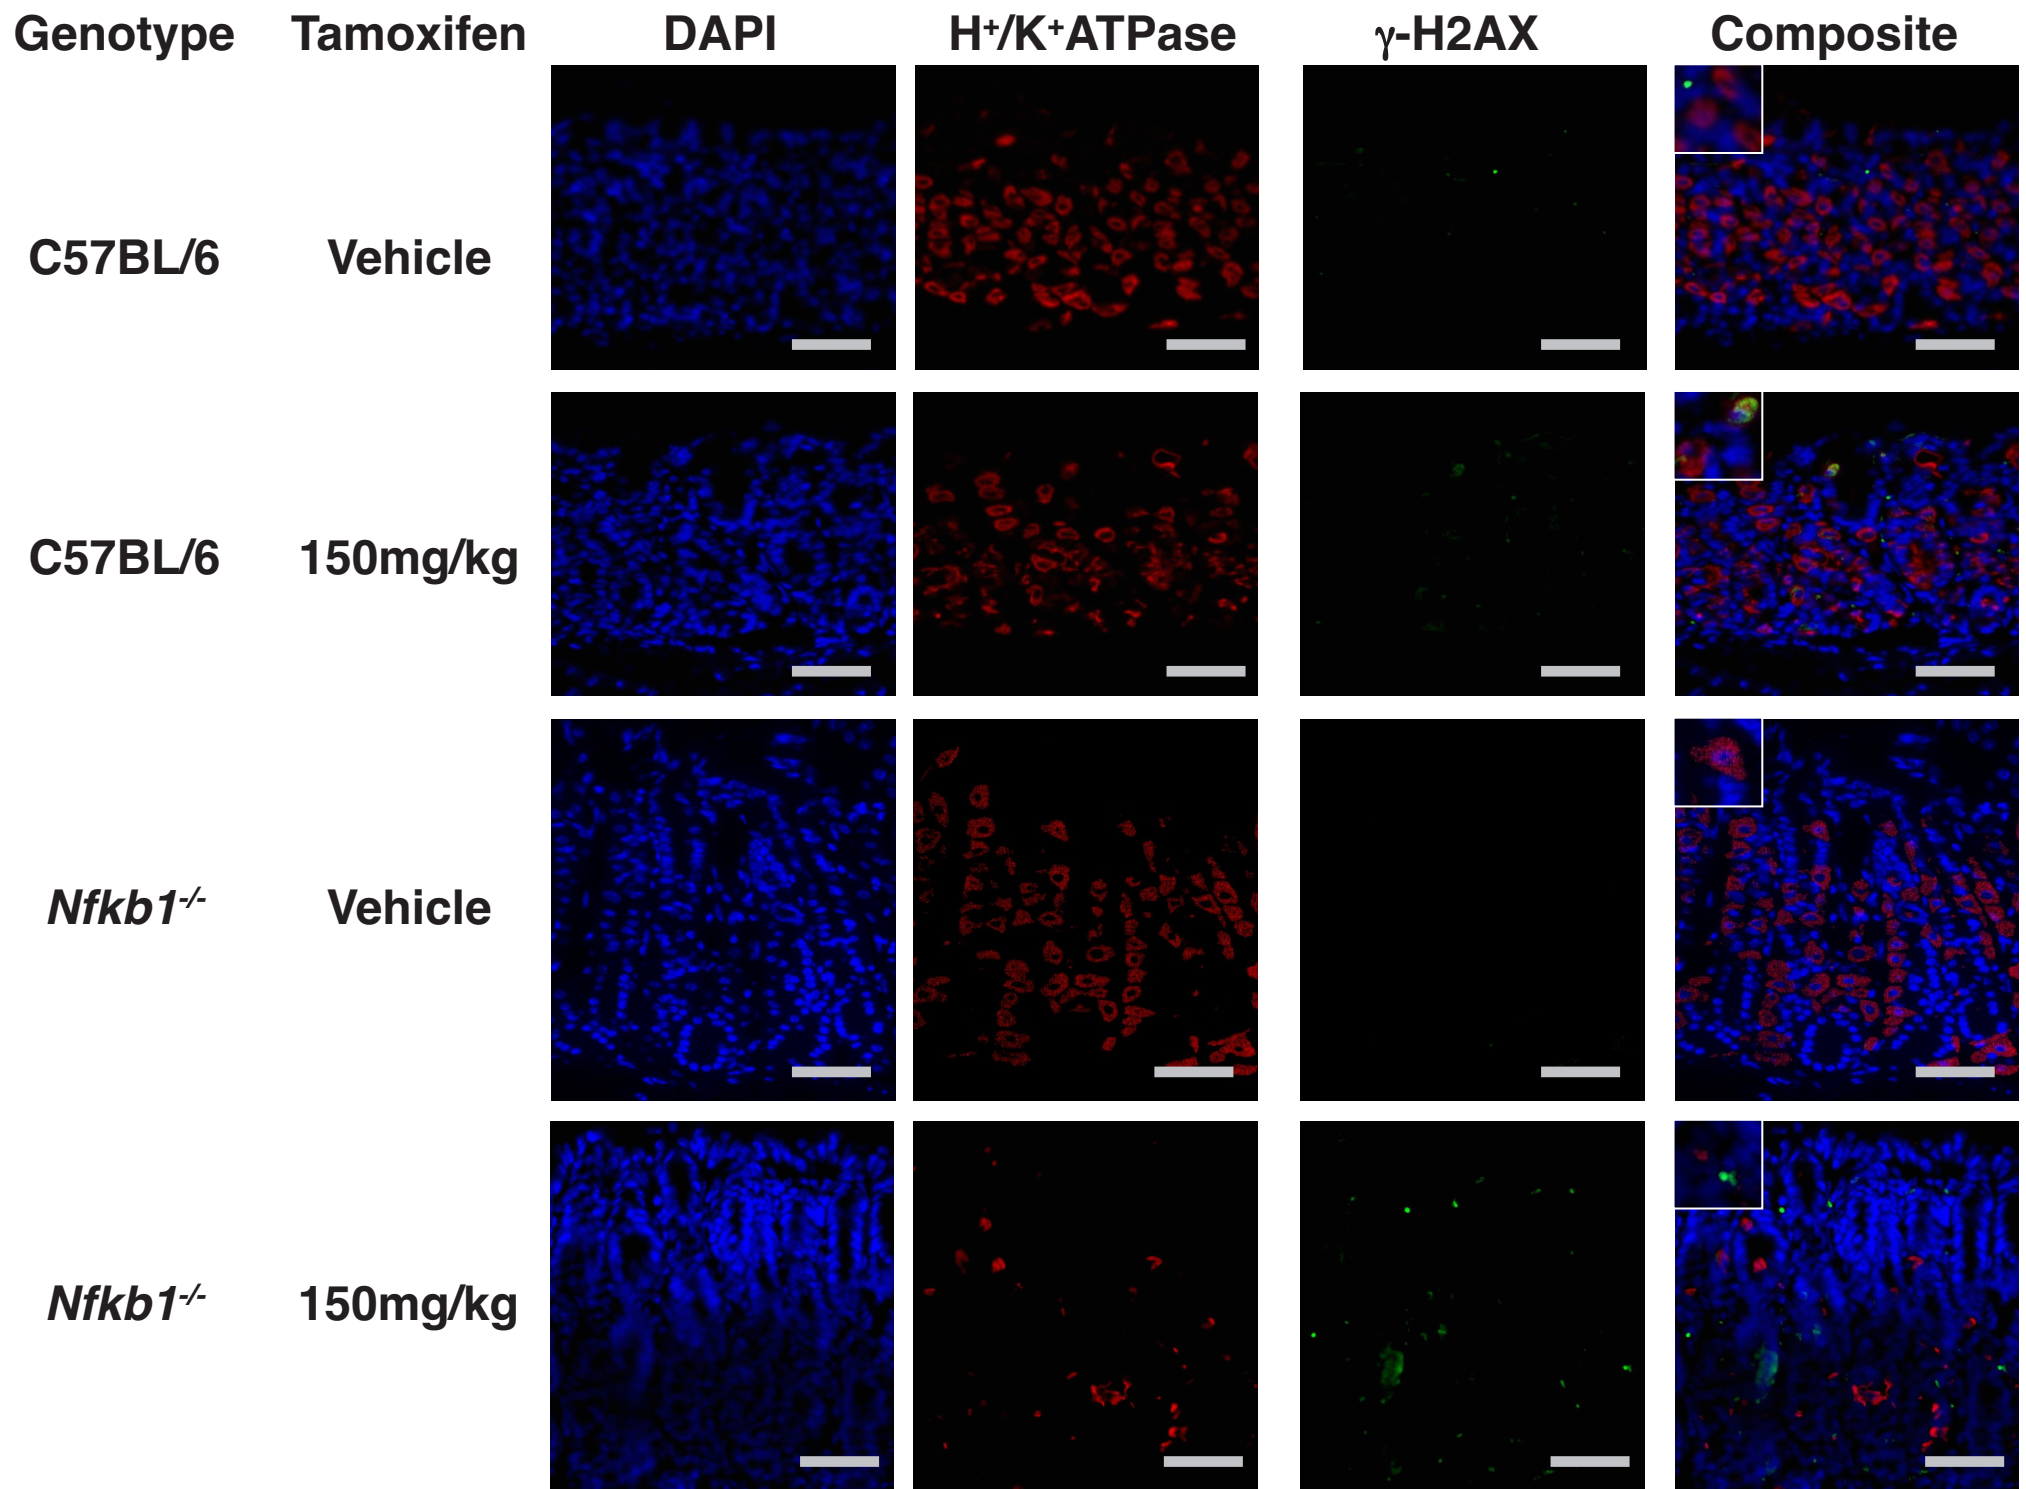

Supplement: cddis2017332x3.pdf [file cddis2017332x3.pdf]
